# Supplementary material for: Osmotic stress induces the phosphorylation of WNK4 Ser575 via the p38MAPK-MK pathway
Source: PubMed Central journal article supplement (PMC4702109; doi:10.1038/srep18710), 2016-01-06

Osmotic stress induces the phosphorylation of WNK4 Ser575 via the p38MAPK-MK pathway

**Junichi Maruyama<sup>1,2</sup>, Yumie Kobayashi<sup>1</sup>, Tsuyoshi Umeda<sup>1</sup>, Alain Vandewalle<sup>3</sup>, Kohsuke Takeda<sup>1,4</sup>, Hidenori Ichijo<sup>\*1</sup> and Isao Naguro<sup>\*1</sup>**

<sup>1</sup>Laboratory of Cell Signaling, Graduate School of Pharmaceutical Sciences, The University of Tokyo, 7-3-1 Hongo, Bunkyo-ku, Tokyo 113-0033, Japan

<sup>2</sup>Department of Medical Biochemistry, Graduate School of Medical and Dental Sciences, Tokyo Medical and Dental University, 1-5-45 Yushima, Bunkyo-ku, Tokyo 113-8510, Japan

<sup>3</sup>Centre de Recherche sur l'Inflammation, UMRS 1149, Université Paris 7, site Bichat, 75018, Paris, France

<sup>4</sup>Cell Regulation, Graduate School of Biomedical Sciences, Nagasaki University, 1-14 Bunkyo-machi, Nagasaki 852-8521, Japan

\*To whom correspondence should be addressed:

Isao Naguro. Tel: +81-3-5841-4858; Fax: +81-3-5841-4798; E-mail: [nagurois@mol.f.u-tokyo.ac.jp](mailto:nagurois@mol.f.u-tokyo.ac.jp)

Hidenori Ichijo. Tel: +81-3-5841-4858; Fax: +81-3-5841-4798; E-mail: [ichijo@mol.f.u-tokyo.ac.jp](mailto:ichijo@mol.f.u-tokyo.ac.jp)

## **Legends for the Supplementary Figures**

### **Supplementary Figure S1. Osmotic stress-dependency of the ASK3-WNK4 interaction**

Osmotic stress-dependency of the ASK3-WNK4 interaction. HEK293A cells were transiently transfected with FLAG-hASK3 and hWNK4-HA. Cells were lysed at 48 h after transfection. Before the lysis, cells were stimulated with the osmotic stimulation buffer as indicated for the indicated times. Lysates were immunoprecipitated with anti-FLAG antibody beads and subjected to IB.

### **Supplementary Figure S2. Profile of the interaction between WNK4 fragments and ASK3**

HEK293A cells were transiently transfected with HA-hASK3 and FLAG-hWNK4 fragments. Cells were lysed at 48 h after transfection. Lysates were immunoprecipitated with anti-FLAG antibody beads and subjected to IB.

### **Supplementary Figure S3. Recombinant MK2 phosphorylates WNK4 Ser575 *in vitro***

0.5  $\mu$ g recombinant MK2 (R&D systems) were incubated with 0.5  $\mu$ g GST-hWNK4 (567-586) and Mg-ATP for 15 min at 30°C. GST was used as a negative control for recombinant MK2 kinase. The reaction was terminated by the addition of SDS sample buffer, and samples were subjected to IB. Phosphorylation of Ser575 residue in GST-hWNK4 (567-586) was analyzed by IB using phospho-Ser575 antibody. Protein amount of recombinant MK2, GST and GST-hWNK4 (567-586) were visualized by Ponceau S staining.

### **Supplementary Figure S4. Involvement of WNK4 Ser575 phosphorylation in the KLHL3-dependent WNK4 regulation**

- (a) Interaction between WNK4 mutants and KLHL3. HEK293A cells were transiently transfected with FLAG-hWNK4 mutants and HA-KLHL3. Cells were lysed at 48 h after transfection. Lysates were immunoprecipitated with anti-FLAG antibody beads and subjected to IB.
- (b) KLHL3-dependent degradation of WNK4 mutants. HEK293A cells were transiently transfected with FLAG-hWNK4 mutants and HA-KLHL3. Cells were lysed at 48 h after transfection. Before lysis, cells were treated with 5  $\mu$ g/ml cycloheximide for the indicated times to inhibit the protein synthesis. Cell lysates were subjected to IB.

**Supplementary Figure S5. Full-length blots of Figure 1**

- (a) Full-length blots of Figure 1b.
- (b) Full-length blots of Figure 1c.

**Supplementary Figure S6. Full-length blots of Figure 2**

- (a) Full-length blots of Figure 2b.
- (b) Full-length blots of Figure 2f.

**Supplementary Figure S7. Full-length blots of Figure 3a-e**

- (a) Full-length blots of Figure 3a.
- (b) Full-length blots of Figure 3b-c.
- (c) Full-length blots of Figure 3d.
- (d) Full-length blots of Figure 3e.

**Supplementary Figure S8. Full-length blots of Figure 3f**

Full-length blots of Figure 3f.

**Supplementary Figure S9. Full-length blots of Figure 4**

- (a) Full-length blots of Figure 4a.
- (b) Full-length blots of Figure 4b.
- (c) Full-length blots of Figure 4c.
- (d) Full-length blots of Figure 4d.

**Supplementary Figure S10. Full-length blots of Figure 5a-c**

- (a) Full-length blots of Figure 5a.
- (b) Full-length blots of Figure 5b.
- (c) Full-length blots of Figure 5c.

**Supplementary Figure S11. Full-length blots of Figure 5d,f**

- (a) Full-length blots of Figure 5d.
- (b) Full-length blots of Figure 5f.

**Supplementary Figure S12. Full-length blots of Figure 6**

- (a) Full-length blots of Figure 6a.
- (b) Full-length blots of Figure 6b.
- (c) Full-length blots of Figure 6d.

# Supplementary Figure S1

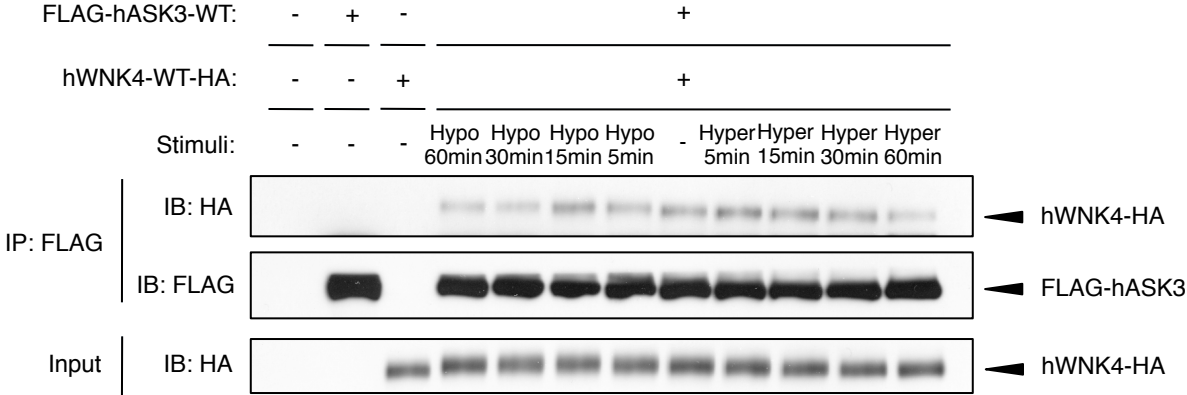

# Supplementary Figure S2

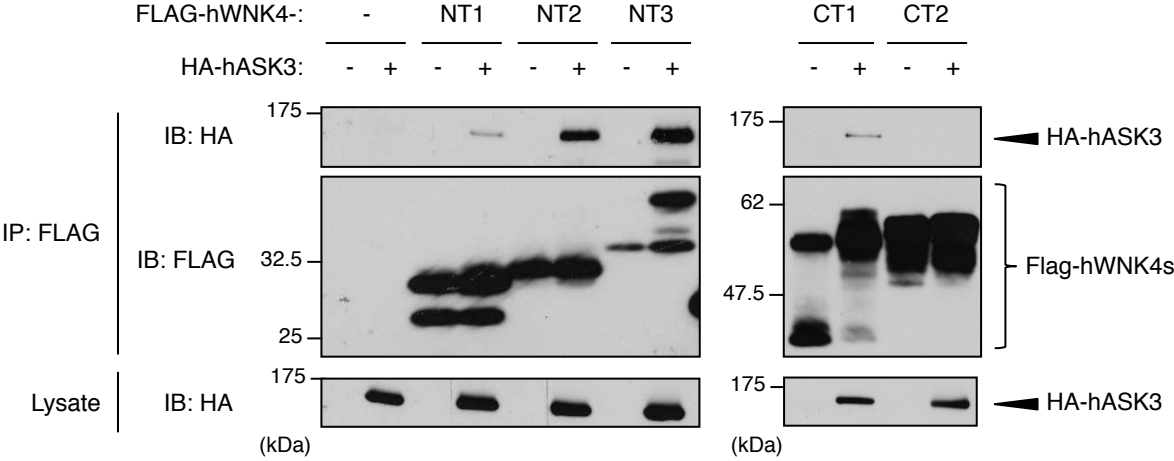

# Supplementary Figure S3

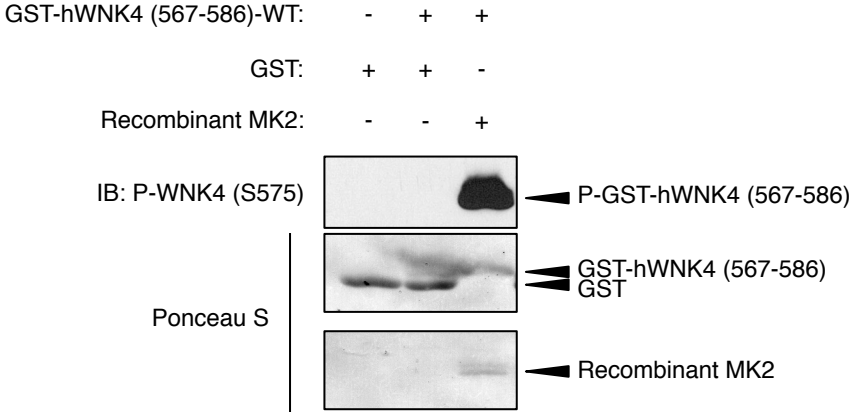

# Supplementary Figure S4

(a)

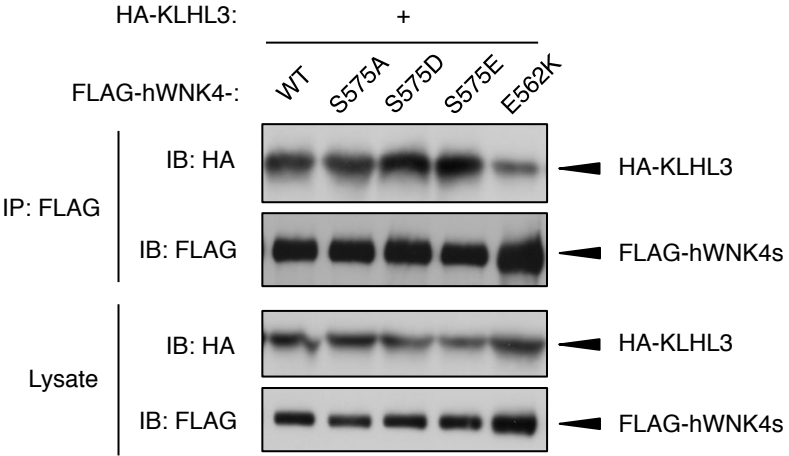

(b)

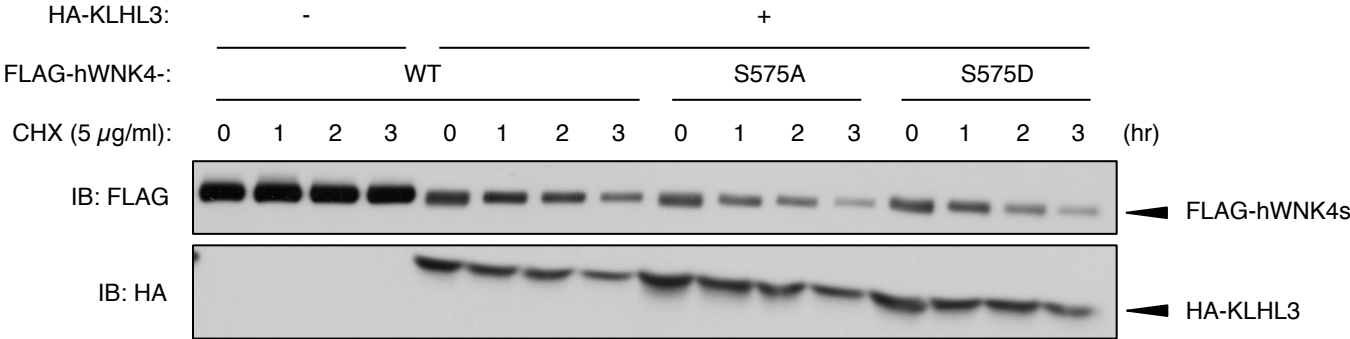



# Supplementary Figure S5

(a)

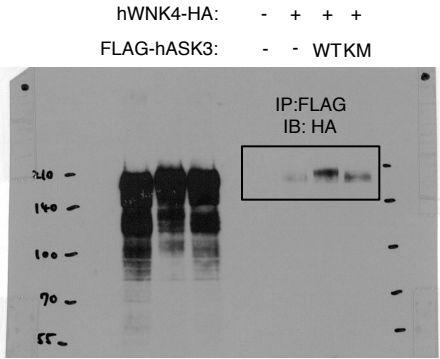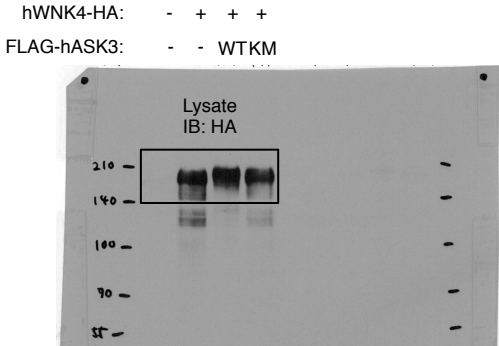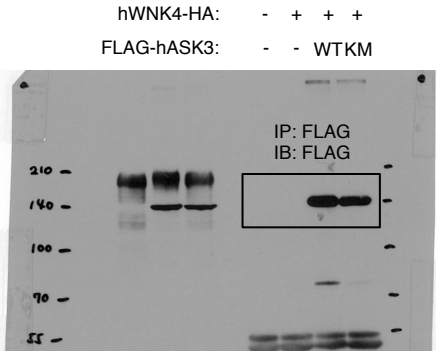

(b)

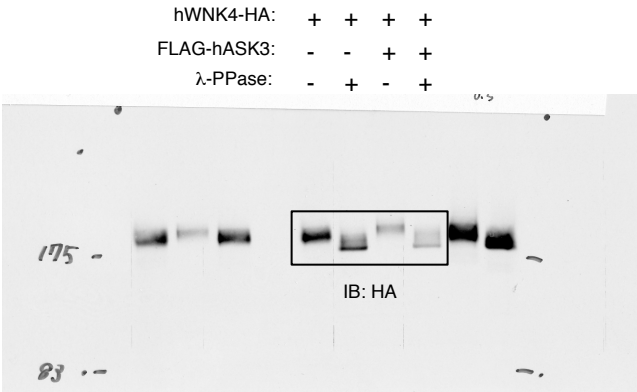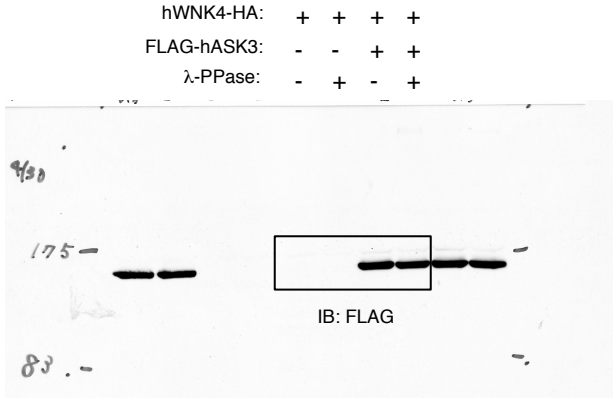

# Supplementary Figure S6

(a)

|              |     |   |     |   |     |   |
|--------------|-----|---|-----|---|-----|---|
| FLAG-hWNK4-: | NT1 |   | NT2 |   | NT3 |   |
| HA-hASK3:    | -   | + | -   | + | -   | + |
| λ-PPase:     | -   | + | -   | + | -   | + |

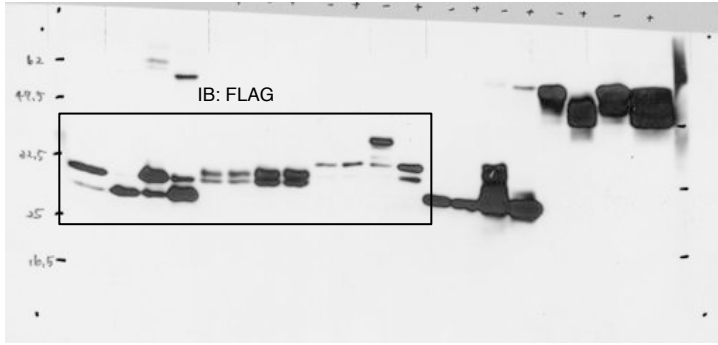

|              |     |   |     |   |     |   |
|--------------|-----|---|-----|---|-----|---|
| FLAG-hWNK4-: | NT1 |   | NT2 |   | NT3 |   |
| HA-hASK3:    | -   | + | -   | + | -   | + |
| λ-PPase:     | -   | + | -   | + | -   | + |

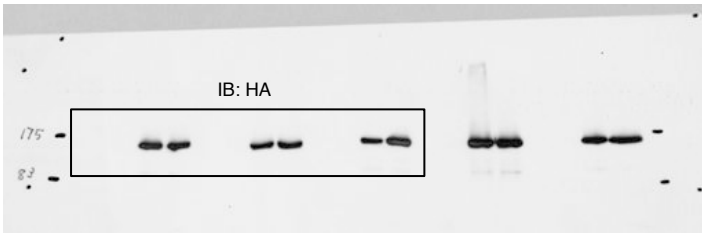

|              |     |   |     |   |
|--------------|-----|---|-----|---|
| FLAG-hWNK4-: | CT1 |   | CT2 |   |
| HA-hASK3:    | -   | + | -   | + |
| λ-PPase:     | -   | + | -   | + |

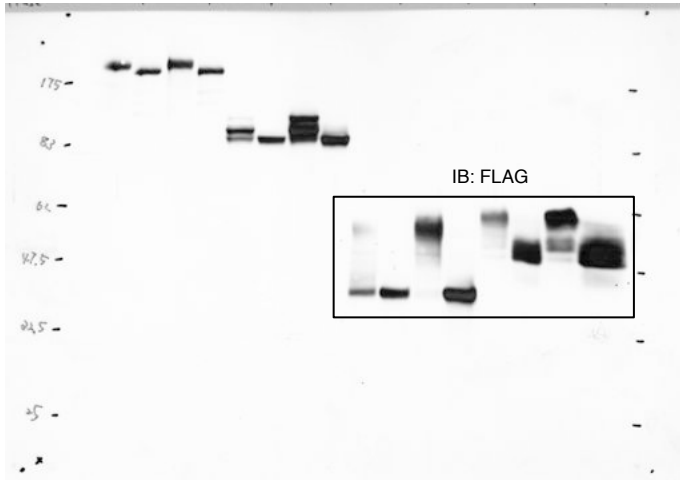

|              |     |   |     |   |
|--------------|-----|---|-----|---|
| FLAG-hWNK4-: | CT1 |   | CT2 |   |
| HA-hASK3:    | -   | + | -   | + |
| λ-PPase:     | -   | + | -   | + |

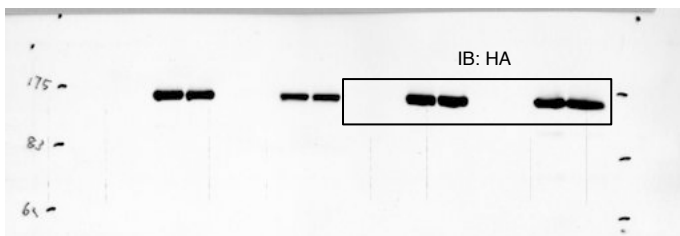

(b)

|                  |    |        |        |       |
|------------------|----|--------|--------|-------|
| FLAG-hASK3:      | +  |        |        |       |
| FLAG-hWNK4-NT3-: | WT | S575AS | S575DS | S575E |
| λ-PPase:         | -  | +      | -      | +     |

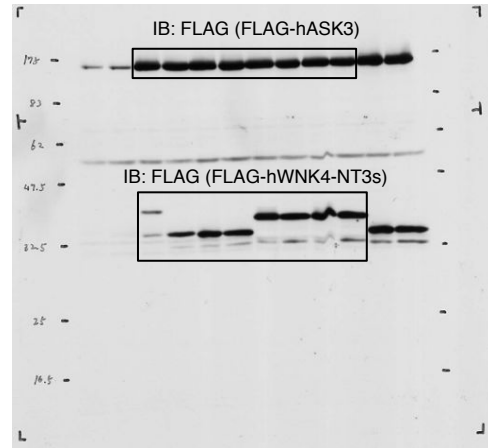

# Supplementary Figure S7

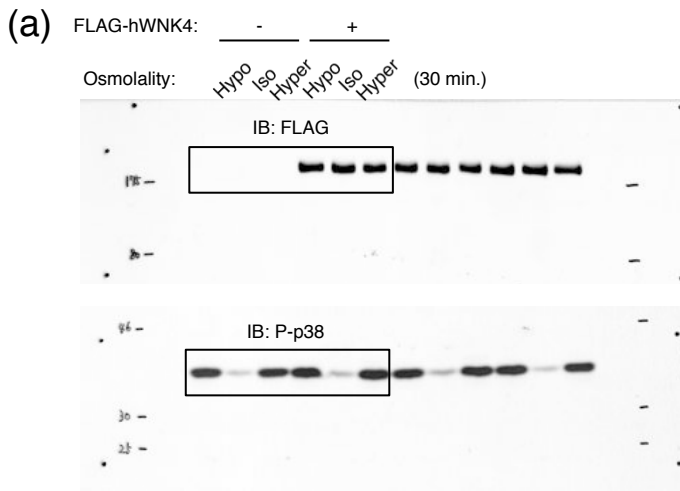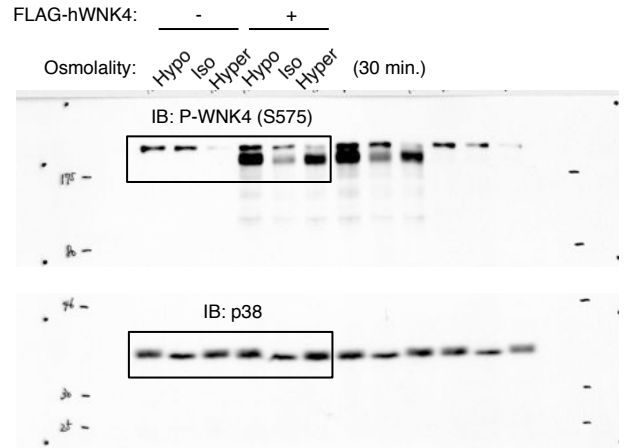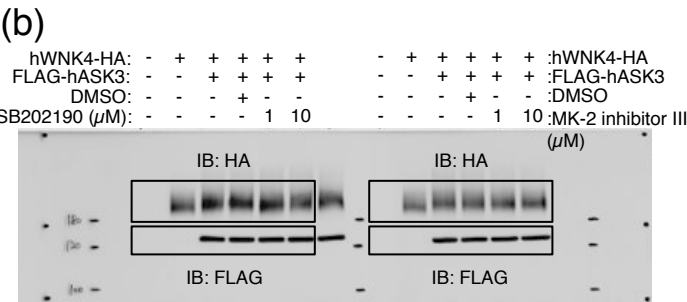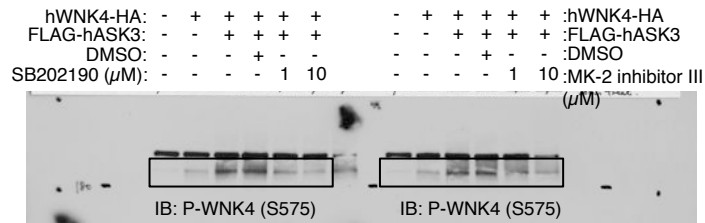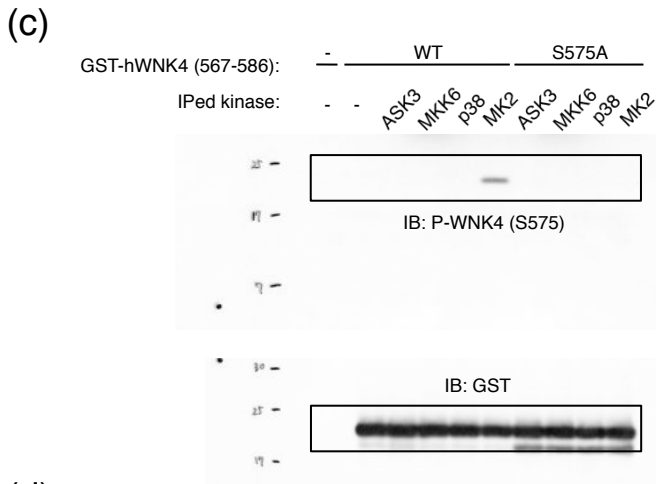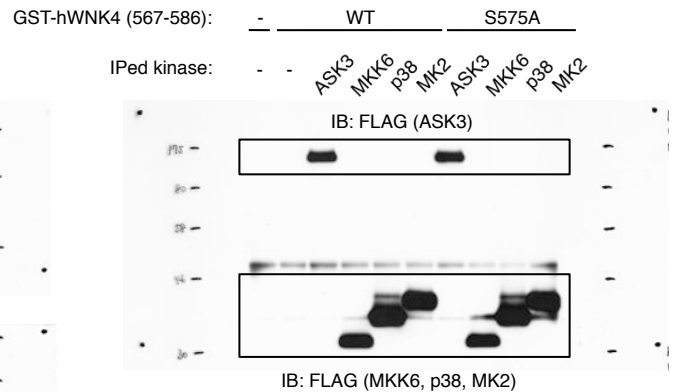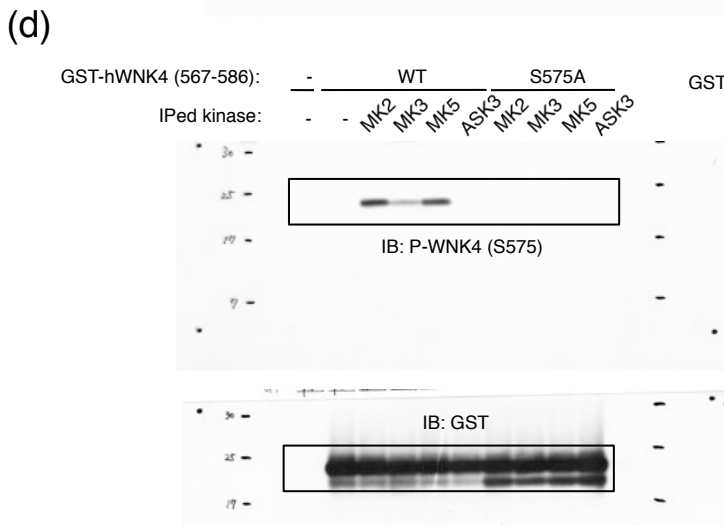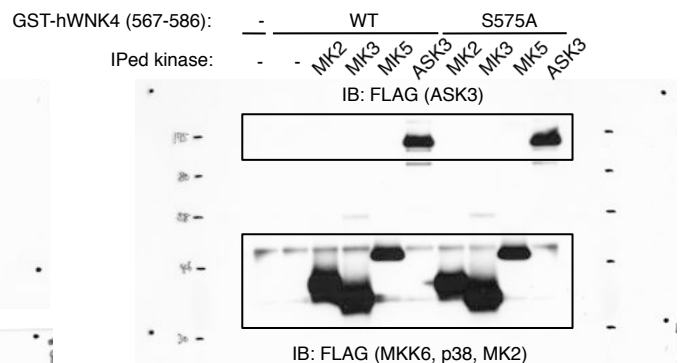

# Supplementary Figure S8

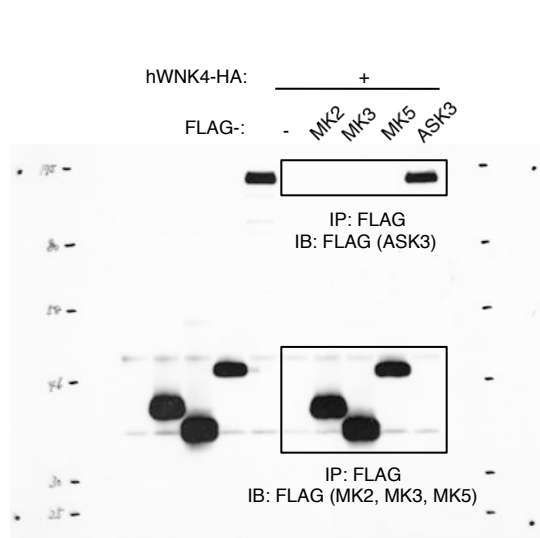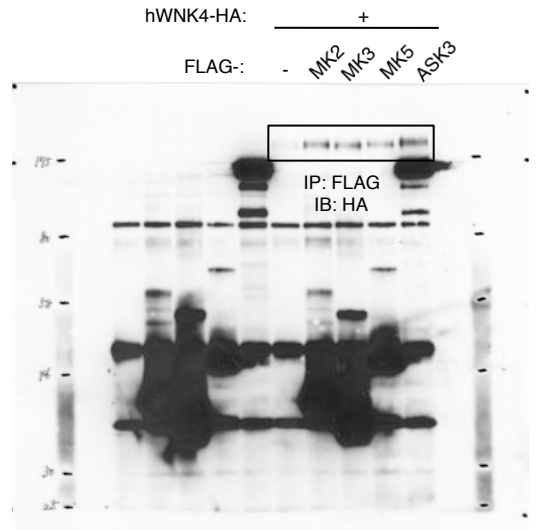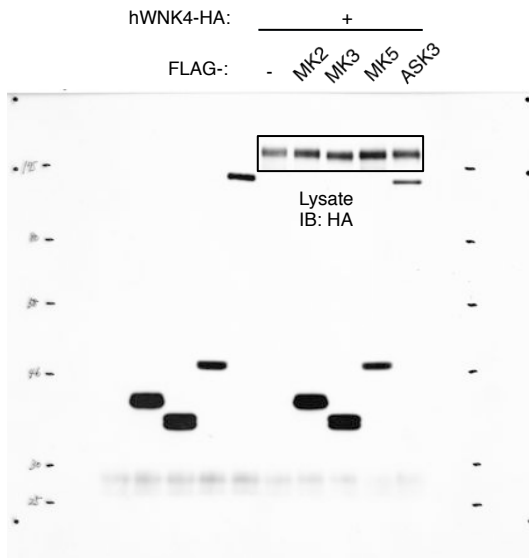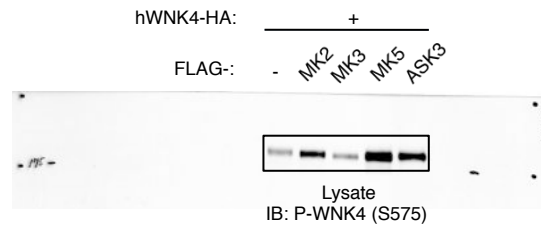

# Supplementary Figure S9

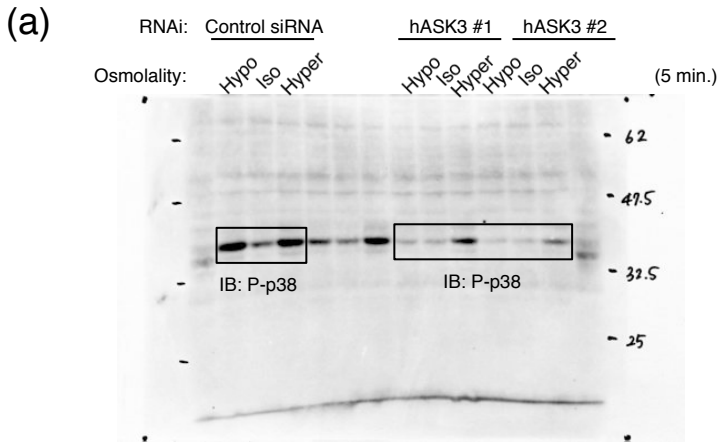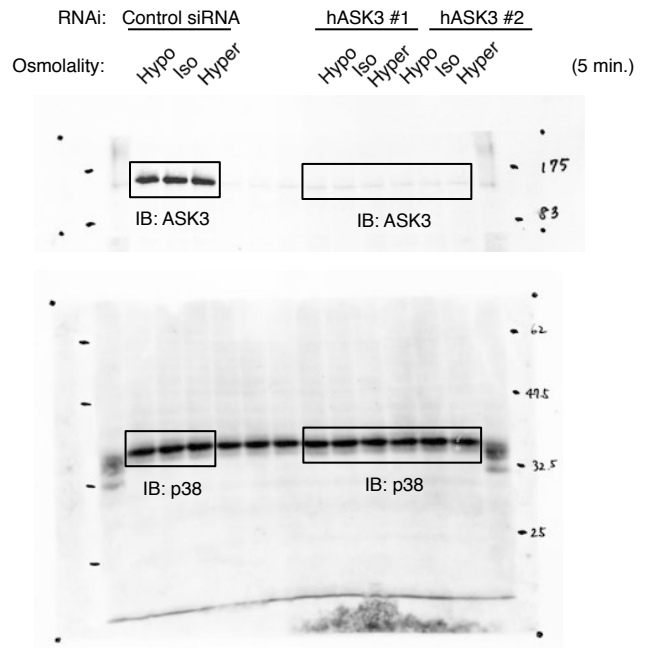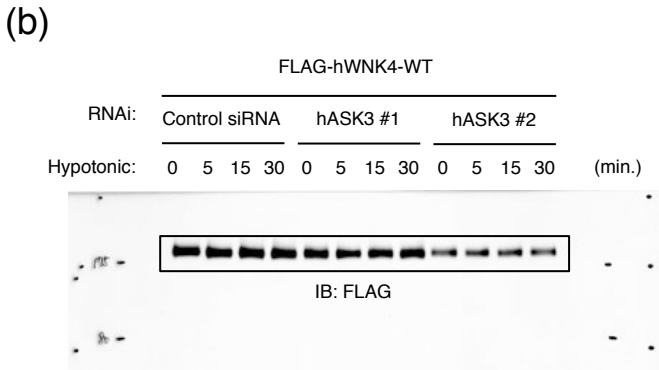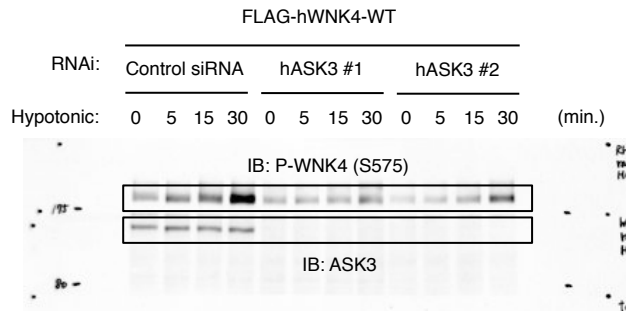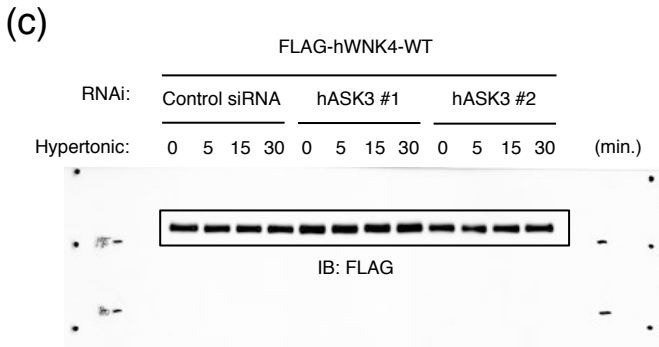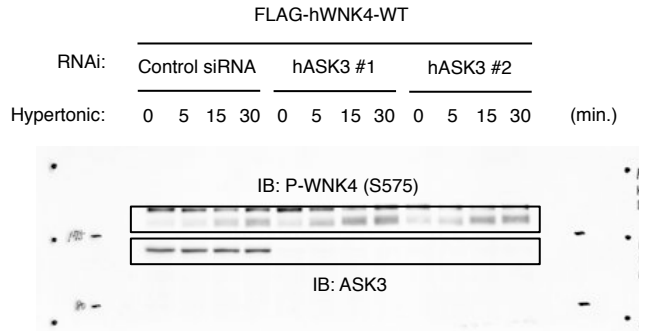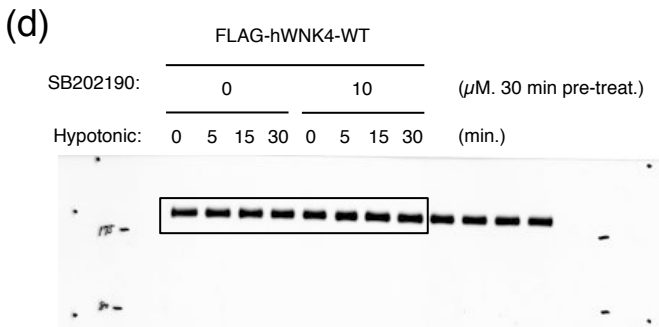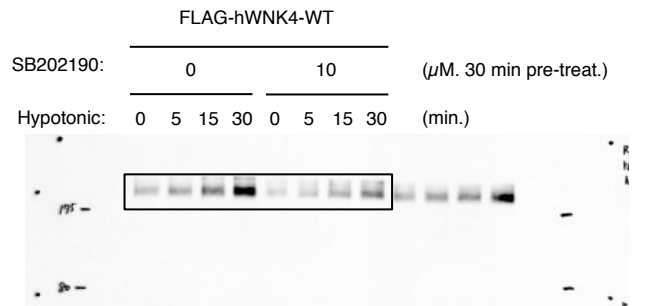

# Supplementary Figure S10

(a)

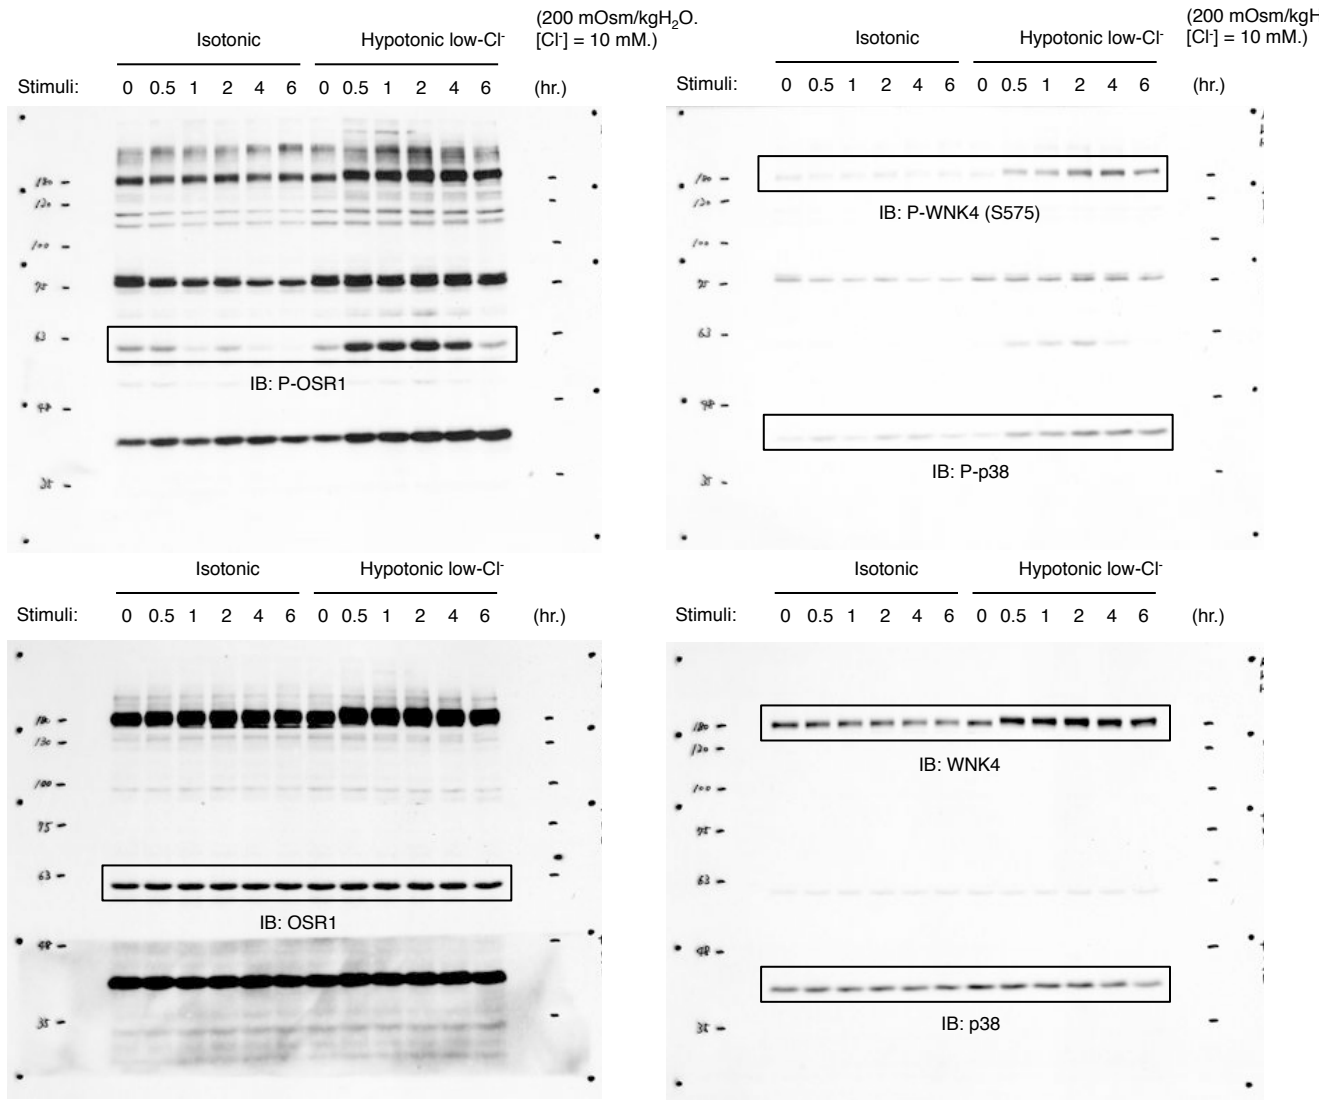

(b)

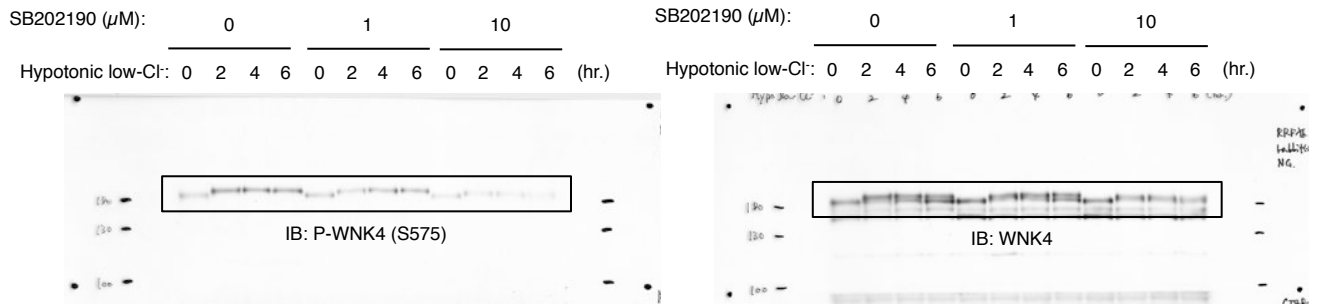

(c)

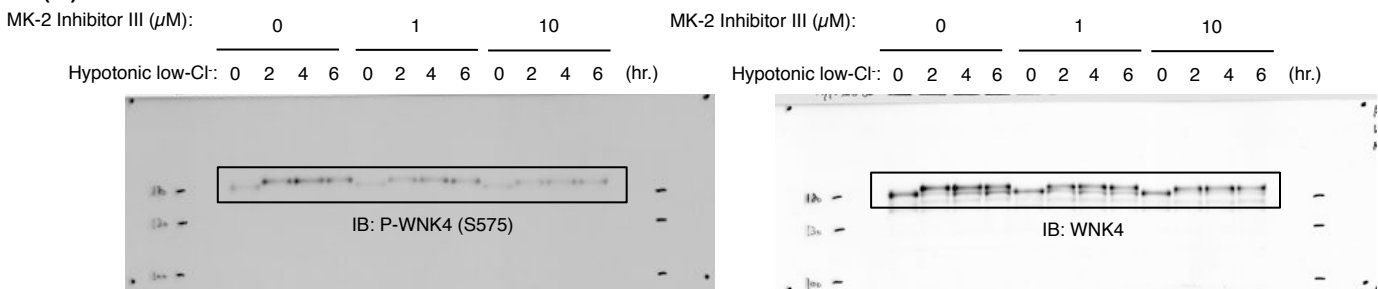

# Supplementary Figure S11

(a)

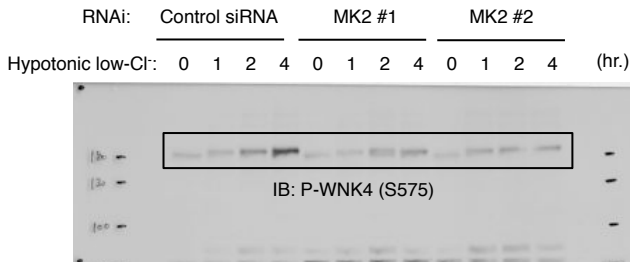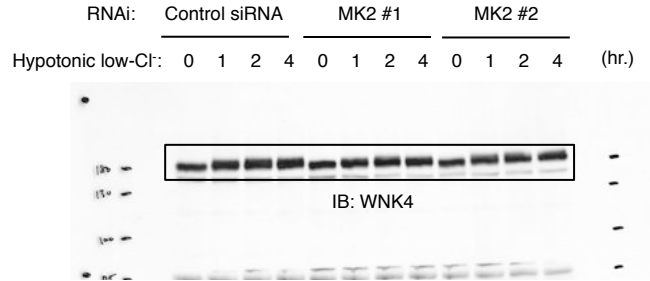

(b)

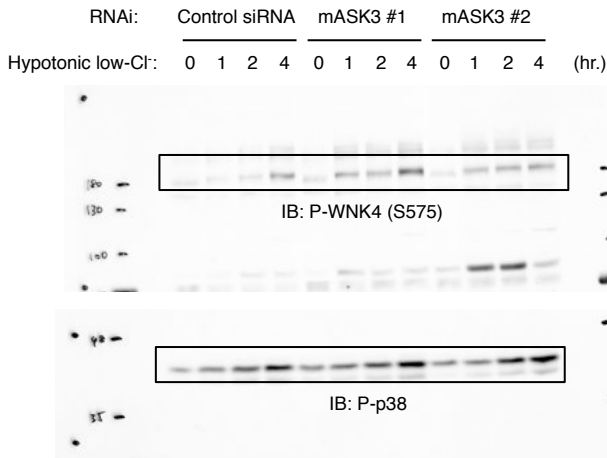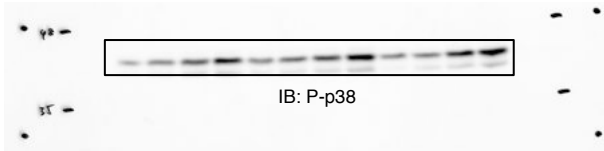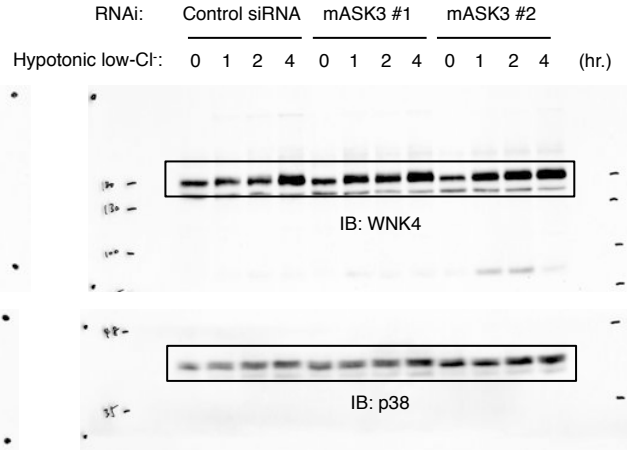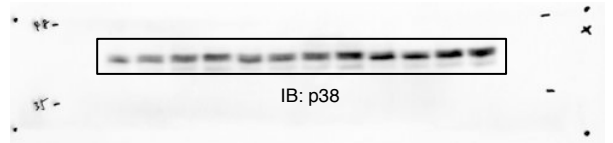

# Supplementary Figure S12

(a)

|                                 |      |       |   |    |     |   |    |           |
|---------------------------------|------|-------|---|----|-----|---|----|-----------|
| GST-rSPAK-CT:                   | -    | +     |   |    |     |   |    |           |
| FLAG-hWNK4:                     | WT - | D321A |   |    | WT  |   |    |           |
| Hypotonic low-Cl <sup>-</sup> : | -    | -     | 0 | 30 | 240 | 0 | 30 | 240(min.) |

|                                 |      |       |   |    |     |   |    |           |
|---------------------------------|------|-------|---|----|-----|---|----|-----------|
| GST-rSPAK-CT:                   | -    | +     |   |    |     |   |    |           |
| FLAG-hWNK4:                     | WT - | D321A |   |    | WT  |   |    |           |
| Hypotonic low-Cl <sup>-</sup> : | -    | -     | 0 | 30 | 240 | 0 | 30 | 240(min.) |

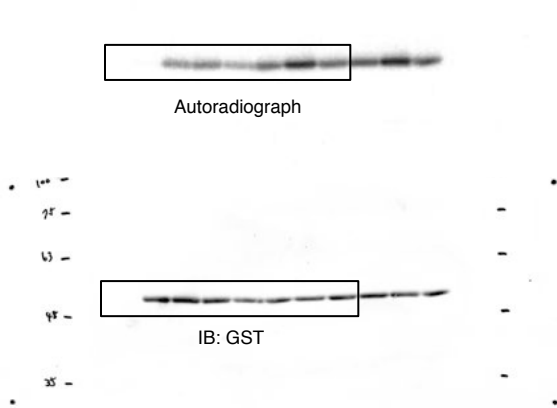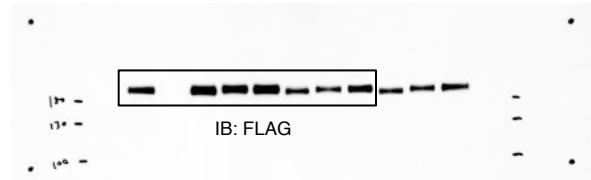

(b)

|               |      |    |   |                     |                     |                     |                     |           |
|---------------|------|----|---|---------------------|---------------------|---------------------|---------------------|-----------|
| GST-rSPAK-CT: | -    | +  |   |                     |                     |                     |                     |           |
| FLAG-hWNK4:   | WT - | WT |   |                     | S575A               |                     |                     |           |
| Stimuli:      | -    | -  | - | Isotonic            | Hypotonic           | Isotonic            | Hypotonic           | (30 min.) |
|               |      |    |   | low-Cl <sup>-</sup> | low-Cl <sup>-</sup> | low-Cl <sup>-</sup> | low-Cl <sup>-</sup> |           |

|               |      |    |   |                     |                     |                     |                     |           |
|---------------|------|----|---|---------------------|---------------------|---------------------|---------------------|-----------|
| GST-rSPAK-CT: | -    | +  |   |                     |                     |                     |                     |           |
| FLAG-hWNK4:   | WT - | WT |   |                     | S575A               |                     |                     |           |
| Stimuli:      | -    | -  | - | Isotonic            | Hypotonic           | Isotonic            | Hypotonic           | (30 min.) |
|               |      |    |   | low-Cl <sup>-</sup> | low-Cl <sup>-</sup> | low-Cl <sup>-</sup> | low-Cl <sup>-</sup> |           |

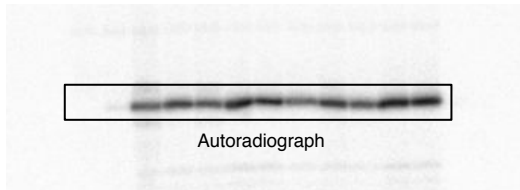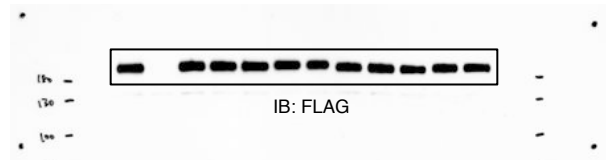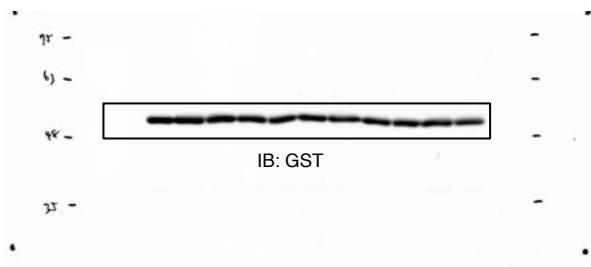

(c)

|                        |                        |
|------------------------|------------------------|
| KLHL3 x1               | KLHL3 x3               |
| WNK4 peptide (557-580) | WNK4 peptide (557-580) |

|       |       |       |       |       |       |
|-------|-------|-------|-------|-------|-------|
| Input | PS575 | E562K | Input | PS575 | E562K |
| x1    | WT    | WT    | x3    | WT    | WT    |

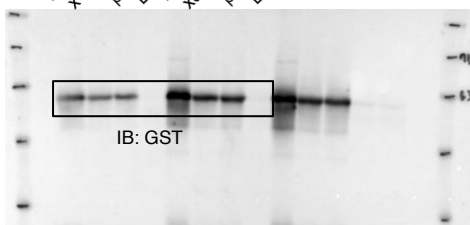

Supplement: srep18710-s1.pdf [file srep18710-s1.pdf]
